# Supplementary material for: Identifying accounting conservatism in the presence of skewness
Source: Springer Nature journal article supplement (doi:10.1007/s11156-023-01210-y), 2023-10-08
Supplement: MOESM1 [file 26141934]

# **Identifying accounting conservatism in the presence of skewness**

## **INTERNET APPENDIX**

**Table A1: Regression results for Size deciles**

Each year, we sort firms into *Size* deciles. Columns report the time-series averages of the regression coefficients from the Basu (1997) model ( $I_{it} = \alpha_0 + \alpha_1 D_{it} + \beta_0 R_{it} + \beta_1 R_{it} \times D_{it} + \varepsilon_{it}$ , see Eq.1 in the main paper) within each decile. In Panel A, B and C, the dependent variable is unexpected earnings (*I*), unexpected accruals (*ACC*), and unexpected cash flows (*CFO*), respectively. *t*-statistics based on heteroskedasticity and autocorrelation consistent (HAC) standard errors in parenthesis. The sample includes 109,452 firm-year observations from 1988 to 2020. *t*-statistics are reported in parentheses. \*, \*\*, and \*\*\* denote statistical significance levels of 10%, 5%, and 1%, respectively (two-tailed). Note that the column D×R is also reported in Table 7A of the main paper.

| Panel A: Asymmetric timeliness of earnings |                     |                     |                     |                     |                     |
|--------------------------------------------|---------------------|---------------------|---------------------|---------------------|---------------------|
|                                            | Intercept           | D                   | R                   | D×R                 | Adj. R <sup>2</sup> |
| Decile 1 (Small)                           | 0.004<br>(0.82)     | -0.017**<br>(-2.36) | 0.037***<br>(3.66)  | 0.164***<br>(9.75)  | 0.058***<br>(10.16) |
| Decile 2                                   | 0.022***<br>(3.97)  | 0.002<br>(0.32)     | 0.012*<br>(1.93)    | 0.160***<br>(12.38) | 0.046***<br>(8.87)  |
| Decile 3                                   | 0.020***<br>(6.33)  | 0.010*<br>(1.95)    | 0.021***<br>(4.40)  | 0.114***<br>(8.17)  | 0.037***<br>(6.84)  |
| Decile 4                                   | 0.029***<br>(8.00)  | 0.005<br>(0.71)     | 0.008<br>(1.42)     | 0.108***<br>(5.59)  | 0.032***<br>(8.72)  |
| Decile 5                                   | 0.026***<br>(14.03) | 0.011**<br>(2.97)   | 0.011**<br>(2.23)   | 0.087***<br>(7.84)  | 0.027***<br>(6.48)  |
| Decile 6                                   | 0.022***<br>(8.06)  | 0.000<br>(0.01)     | 0.012**<br>(2.44)   | 0.043***<br>(4.71)  | 0.017***<br>(4.18)  |
| Decile 7                                   | 0.015***<br>(5.31)  | 0.006*<br>(1.88)    | 0.012<br>(2.48)     | 0.047***<br>(2.84)  | 0.017<br>(3.86)     |
| Decile 8                                   | 0.009***<br>(4.86)  | 0.009***<br>(3.26)  | 0.003<br>(0.78)     | 0.061***<br>(5.57)  | 0.015***<br>(3.62)  |
| Decile 9                                   | 0.004<br>(1.40)     | 0.004<br>(1.18)     | 0.007<br>(1.59)     | 0.026**<br>(2.47)   | 0.013**<br>(2.43)   |
| Decile 10 (Large)                          | -0.004<br>(-1.17)   | 0.003<br>(1.60)     | 0.002<br>(0.37)     | 0.028**<br>(2.22)   | 0.013***<br>(4.35)  |
| Small-Large                                | 0.008<br>(0.992)    | -0.02**<br>(-2.536) | 0.036***<br>(3.028) | 0.136***<br>(6.94)  | 0.045***<br>(7.475) |

| Panel B: Asymmetric timeliness of accruals |                       |                    |                    |                    |                       |
|--------------------------------------------|-----------------------|--------------------|--------------------|--------------------|-----------------------|
|                                            | Intercept             | D                  | R                  | D×R                | Adj. R <sup>2</sup>   |
| Decile 1 (Small)                           | -0.029**<br>(-2.56)   | -0.015<br>(-0.90)  | 0.016<br>(1.19)    | 0.094**<br>(2.32)  | 0.008***<br>(3.81)    |
| Decile 2                                   | -0.014*<br>(-1.84)    | 0.015<br>(1.57)    | 0.01<br>(1.35)     | 0.118***<br>(4.86) | 0.011***<br>(3.06)    |
| Decile 3                                   | -0.006<br>(-1.37)     | -0.007<br>(-0.39)  | 0.016**<br>(2.48)  | 0.021<br>(0.40)    | 0.011***<br>(3.81)    |
| Decile 4                                   | 0.011**<br>(1.96)     | 0.003<br>(0.44)    | 0.008<br>(1.60)    | 0.083***<br>(3.19) | 0.009**<br>(2.48)     |
| Decile 5                                   | 0.019***<br>(5.17)    | 0.002<br>(0.35)    | 0.01*<br>(1.89)    | 0.062***<br>(3.16) | 0.008**<br>(2.11)     |
| Decile 6                                   | 0.024***<br>(7.54)    | -0.004<br>(-0.70)  | 0.01<br>(1.28)     | 0.045***<br>(3.74) | 0.007**<br>(2.77)     |
| Decile 7                                   | 0.019***<br>(6.43)    | 0.006<br>(1.12)    | 0.016***<br>(3.11) | 0.044***<br>(3.31) | 0.009***<br>(3.20)    |
| Decile 8                                   | 0.022***<br>(4.60)    | 0.011*<br>(1.83)   | 0.013<br>(1.24)    | 0.053**<br>(2.69)  | 0.014***<br>(3.78)    |
| Decile 9                                   | 0.028***<br>(5.37)    | -0.004<br>(-0.96)  | 0.017***<br>(2.83) | 0.011<br>(0.76)    | 0.014***<br>(3.05)    |
| Decile 10 (Large)                          | 0.02***<br>(2.70)     | 0.004<br>(1.35)    | 0.027***<br>(5.68) | 0.000<br>(-0.01)   | 0.020***<br>(5.20)    |
| Small-Large                                | -0.049***<br>(-3.136) | -0.019<br>(-1.077) | -0.011<br>(-0.89)  | 0.094**<br>(1.971) | -0.013***<br>(-2.642) |

| Panel C: Asymmetric timeliness of cash flows |                      |                   |                      |                   |                     |
|----------------------------------------------|----------------------|-------------------|----------------------|-------------------|---------------------|
|                                              | Intercept            | D                 | R                    | D×R               | Adj. R <sup>2</sup> |
| Decile 1 (Small)                             | 0.033***<br>(3.38)   | -0.002<br>(-0.11) | 0.021<br>(1.71)      | 0.07<br>(1.52)    | 0.008**<br>(2.43)   |
| Decile 2                                     | 0.035***<br>(6.17)   | -0.013<br>(-1.39) | 0.002<br>(0.32)      | 0.042**<br>(1.98) | 0.008***<br>(3.02)  |
| Decile 3                                     | 0.027***<br>(8.41)   | 0.017<br>(0.92)   | 0.005<br>(0.91)      | 0.093*<br>(1.74)  | 0.005**<br>(2.10)   |
| Decile 4                                     | 0.018***<br>(4.21)   | 0.001<br>(0.15)   | 0.000<br>(-0.01)     | 0.024<br>(1.29)   | 0.002<br>(0.80)     |
| Decile 5                                     | 0.007**<br>(2.55)    | 0.009<br>(1.63)   | 0.001<br>(0.29)      | 0.025**<br>(1.97) | 0.001<br>(0.42)     |
| Decile 6                                     | -0.002<br>(-0.86)    | 0.004<br>(0.87)   | 0.002<br>(0.47)      | -0.003<br>(-0.27) | -0.002**<br>(-2.40) |
| Decile 7                                     | -0.004<br>(-1.53)    | 0.000<br>(-0.08)  | -0.004<br>(-0.59)    | 0.003<br>(0.27)   | 0.002<br>(1.41)     |
| Decile 8                                     | -0.014**<br>(-2.51)  | -0.002<br>(-0.32) | -0.01<br>(-0.95)     | 0.008<br>(0.50)   | 0.005*<br>(1.69)    |
| Decile 9                                     | -0.024***<br>(-6.77) | 0.007**<br>(2.33) | -0.01*<br>(-1.77)    | 0.014<br>(0.85)   | 0.007***<br>(3.46)  |
| Decile 10 (Large)                            | -0.024***<br>(-5.42) | -0.001<br>(-0.54) | -0.026***<br>(-4.12) | 0.028<br>(0.82)   | 0.013***<br>(3.87)  |
| Small-Large                                  | 0.057***<br>(5.548)  | 0.000<br>(-0.024) | 0.047***<br>(3.848)  | 0.042<br>(0.732)  | -0.005<br>(-1.07)   |

**Table A2: Regression results for MTB deciles**

Each year, we sort firms into *MTB* deciles. Columns report the time-series averages of the regression coefficients from the Basu (1997) model ( $I_{it} = \alpha_0 + \alpha_1 D_{it} + \beta_0 R_{it} + \beta_1 R_{it} \times D_{it} + \varepsilon_{it}$ , see Eq.1 in the main paper) within each decile. In Panel A, B and C, the dependent variable is unexpected earnings (*I*), unexpected accruals (*ACC*), and unexpected cash flows (*CFO*), respectively. *t*-statistics based on heteroskedasticity and autocorrelation consistent (HAC) standard errors in parenthesis. The sample includes 109,452 firm-year observations from 1988 to 2020. *t*-statistics are reported in parentheses. \*, \*\*, and \*\*\* denote statistical significance levels of 10%, 5%, and 1%, respectively (two-tailed). Note that the column D×R is also reported in Table 7B of the main paper.

| Panel A: Asymmetric timeliness of earnings |                    |                    |                    |                     |                     |
|--------------------------------------------|--------------------|--------------------|--------------------|---------------------|---------------------|
|                                            | Intercept          | D                  | R                  | D×R                 | Adj. R <sup>2</sup> |
| Decile 1 (Value)                           | 0.006<br>(0.94)    | 0.007<br>(0.67)    | 0.029***<br>(3.29) | 0.181***<br>(10.32) | 0.043***<br>(6.98)  |
| Decile 2                                   | 0.024***<br>(5.08) | 0.013***<br>(2.76) | 0.024*<br>(1.89)   | 0.141***<br>(7.23)  | 0.039***<br>(6.40)  |
| Decile 3                                   | 0.022***<br>(6.70) | 0.011***<br>(3.05) | 0.028***<br>(4.61) | 0.124***<br>(7.69)  | 0.046***<br>(5.76)  |
| Decile 4                                   | 0.017***<br>(6.31) | 0.006*<br>(1.88)   | 0.013**<br>(2.04)  | 0.096***<br>(5.99)  | 0.031***<br>(8.81)  |
| Decile 5                                   | 0.012***<br>(5.10) | 0.015***<br>(5.17) | 0.023***<br>(4.28) | 0.113***<br>(4.24)  | 0.044***<br>(6.47)  |
| Decile 6                                   | 0.010***<br>(4.57) | 0.005<br>(1.30)    | 0.013***<br>(2.86) | 0.066***<br>(4.89)  | 0.023***<br>(5.58)  |
| Decile 7                                   | 0.009***<br>(3.00) | 0.009***<br>(2.57) | 0.014***<br>(2.95) | 0.068***<br>(7.33)  | 0.029***<br>(5.79)  |
| Decile 8                                   | 0.009***<br>(3.87) | 0.002<br>(0.72)    | 0.01***<br>(4.14)  | 0.045***<br>(3.97)  | 0.019***<br>(4.88)  |
| Decile 9                                   | 0.008***<br>(2.83) | 0.003<br>(1.01)    | 0.014***<br>(2.95) | 0.036***<br>(3.14)  | 0.017***<br>(6.24)  |
| Decile 10 (Growth)                         | 0.009***<br>(4.50) | 0.002<br>(0.49)    | 0.02***<br>(5.57)  | 0.026*<br>(1.88)    | 0.018***<br>(6.33)  |
| Value-Growth                               | -0.003<br>(-0.324) | 0.005<br>(0.489)   | 0.009<br>(0.92)    | 0.155***<br>(7.19)  | 0.026***<br>(4.394) |

| Panel B: Asymmetric timeliness of accruals |                      |                    |                    |                     |                     |
|--------------------------------------------|----------------------|--------------------|--------------------|---------------------|---------------------|
|                                            | Intercept            | D                  | R                  | D×R                 | Adj. R <sup>2</sup> |
| Decile 1 (Value)                           | -0.048***<br>(-3.93) | 0.000<br>(-0.02)   | 0.006<br>(0.46)    | 0.163***<br>(3.77)  | 0.008***<br>(2.72)  |
| Decile 2                                   | 0.002<br>(0.44)      | -0.011<br>(-0.53)  | -0.011<br>(-1.13)  | 0.055<br>(0.73)     | 0.011***<br>(3.47)  |
| Decile 3                                   | 0.011***<br>(2.60)   | 0.006<br>(1.06)    | 0.009<br>(1.17)    | 0.096***<br>(4.21)  | 0.011***<br>(3.20)  |
| Decile 4                                   | 0.013***<br>(2.98)   | 0.016***<br>(2.89) | 0.013<br>(1.30)    | 0.094***<br>(3.09)  | 0.014***<br>(3.84)  |
| Decile 5                                   | 0.019***<br>(5.39)   | 0.006<br>(0.89)    | 0.023***<br>(3.16) | 0.070***<br>(3.02)  | 0.017***<br>(4.17)  |
| Decile 6                                   | 0.021***<br>(6.25)   | 0.009<br>(1.21)    | 0.012*<br>(1.81)   | 0.054***<br>(3.13)  | 0.011***<br>(3.27)  |
| Decile 7                                   | 0.021***<br>(5.51)   | 0.005*<br>(1.65)   | 0.011*<br>(1.64)   | 0.042***<br>(3.25)  | 0.010***<br>(3.38)  |
| Decile 8                                   | 0.025***<br>(8.51)   | 0.005<br>(1.20)    | 0.008**<br>(2.06)  | 0.041***<br>(2.78)  | 0.009***<br>(3.76)  |
| Decile 9                                   | 0.021***<br>(5.73)   | 0.000<br>(-0.07)   | 0.012***<br>(3.49) | 0.022*<br>(1.95)    | 0.009***<br>(3.83)  |
| Decile 10 (Growth)                         | 0.016***<br>(4.71)   | -0.001<br>(-0.29)  | 0.013***<br>(4.39) | 0.013<br>(1.36)     | 0.007***<br>(3.25)  |
| Value-Growth                               | -0.064***<br>(-4.32) | 0.001<br>(0.077)   | -0.007<br>(-0.499) | 0.151***<br>(3.428) | 0.001<br>0.232      |

| Panel C: Asymmetric timeliness of cash flows |                      |                   |                    |                    |                     |
|----------------------------------------------|----------------------|-------------------|--------------------|--------------------|---------------------|
|                                              | Intercept            | D                 | R                  | D×R                | Adj. R <sup>2</sup> |
| Decile 1 (Value)                             | 0.054***<br>(6.21)   | 0.007<br>(0.79)   | 0.022*<br>(1.70)   | 0.017<br>(0.44)    | 0.002<br>(0.72)     |
| Decile 2                                     | 0.022***<br>(5.66)   | 0.024<br>(1.16)   | 0.035***<br>(3.15) | 0.085<br>(1.15)    | 0.005*<br>(1.78)    |
| Decile 3                                     | 0.011**<br>(2.80)    | 0.005<br>(0.97)   | 0.019**<br>(2.04)  | 0.028*<br>(1.73)   | 0.006**<br>(2.25)   |
| Decile 4                                     | 0.004<br>(0.88)      | -0.01*<br>(-1.91) | 0.000<br>(-0.03)   | 0.003<br>(0.10)    | 0.002*<br>(1.83)    |
| Decile 5                                     | -0.007**<br>(-2.24)  | 0.009<br>(1.40)   | 0.000<br>(0.03)    | 0.043***<br>(3.04) | 0.002<br>(1.21)     |
| Decile 6                                     | -0.011***<br>(-3.38) | -0.004<br>(-0.66) | 0.001<br>(0.18)    | 0.012<br>(0.78)    | 0.002*<br>(1.78)    |
| Decile 7                                     | -0.012***<br>(-3.66) | 0.004<br>(1.02)   | 0.003<br>(0.44)    | 0.026**<br>(2.18)  | 0.006**<br>(2.31)   |
| Decile 8                                     | -0.016***<br>(-4.22) | -0.003<br>(-0.70) | 0.002<br>(0.44)    | 0.004<br>(0.29)    | 0.003<br>(1.53)     |
| Decile 9                                     | -0.013***<br>(-5.33) | 0.003<br>(0.82)   | 0.002<br>(0.51)    | 0.014<br>(1.39)    | 0.002<br>(1.20)     |
| Decile 10 (Growth)                           | -0.008***<br>(-2.65) | 0.003<br>(0.73)   | 0.006<br>(1.52)    | 0.013<br>(1.53)    | 0.003**<br>(2.18)   |
| Value-Growth                                 | 0.062***<br>(6.175)  | 0.004<br>(0.495)  | 0.016<br>(1.20)    | 0.004<br>(0.113)   | -0.001<br>(-0.592)  |
